# Supplementary material
Source: PubMed Central journal article supplement (PMC9108100)
Supplement: mmc1.pdf [file mmc1.pdf]

**Supplemental information**

**Human NLRP1 is a sensor of pathogenic  
coronavirus 3CL proteases in lung  
epithelial cells**

**Rémi Planès, Miriam Pinilla, Karin Santoni, Audrey Hessel, Charlotte Passemar, Kenneth Lay, Perrine Paillette, Ana-Luiza Chaves Valadão, Kim Samirah Robinson, Paul Bastard, Nathaniel Lam, Ricardo Fadrique, Ida Rossi, David Pericat, Salimata Bagayoko, Stephen Adonai Leon-Icaza, Yoann Rombouts, Eric Perouzel, Michèle Tiraby, COVID Human Genetic Effort, Qian Zhang, Pietro Cicuti, Emmanuelle Jouanguy, Olivier Neyrolles, Clare E. Bryant, Andres R. Floto, Caroline Goujon, Franklin Zhong Lei, Guillaume Martin-Blondel, Stein Silva, Jean-Laurent Casanova, Céline Cougoule, Bruno Reversade, Julien Marcoux, Emmanuel Ravet, and Etienne Meunier**

# SUPPLEMENTAL INFORMATIONS

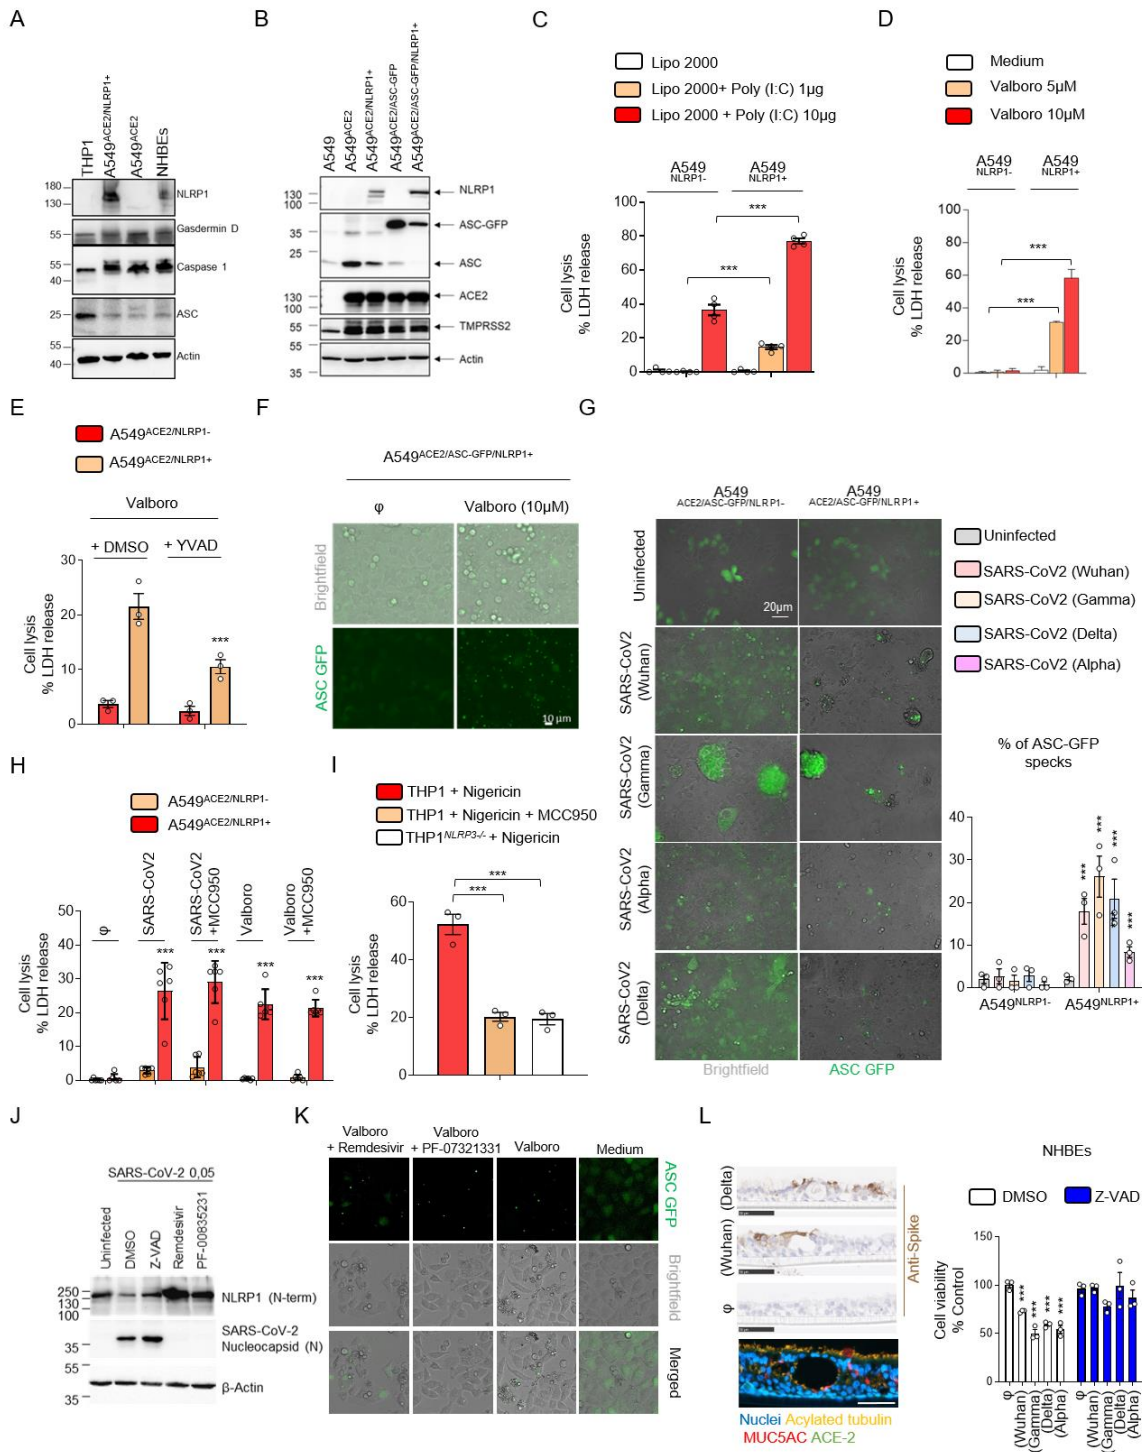

**Figure S1 (Related to Figure 1). NLRP1 detects SARS-CoV-2 infection in epithelial cells**

(A) Western Blot examination of the expression of NLRP1, ASC, Gasdermin-D (GSDMD), Caspase-1 (CASP1) and ACTIN in THP-1 (monocytes), NHBE (bronchial epithelial cells) or A549 cells engineered for the purpose of this study. Immunoblots

were performed against full-length NLRP1 Nter (p130/110), ASC (p22), GSDMD (p55), CASP1 (p50) and ACTIN (p40).

(B) Western Blot examination of the expression of NLRP1, ASC, ASC-GFP, ACE2, TMRSS2 and ACTIN in A549 cells engineered for the purpose of this study. Immunoblots were performed against full-length NLRP1 Nter (p130/110), ASC (p22), ASC-GFP (p50), TMRSS2 (p54), ACE2 (p130) and ACTIN (p40).

(C-E) Measure of cell lysis (LDH release) in A549<sup>NLRP1+</sup> or A549<sup>NLRP1-</sup> transfected with polyI:C (0.1µg or 1µg) (B) or treated with Valboro (5 and 10µM) (C) in presence/absence of the Caspase-1 inhibitor Z-YVAD (25µM) for 10 hours.

(F) Florescence microscopy of ASC-GFP specks in A549<sup>ACE2/NLRP1+/ASC-GFP</sup> and A549<sup>ACE2/NLRP1-/ASC-GFP</sup> airway epithelial cell lines treated with 5µM of Valboro for 10 hours. Images shown are from one experiment and are representative of n=3 independent experiments; scale bars 10 µm.

(G) Florescence microscopy and associated quantifications of ASC-GFP specks in A549<sup>ACE2/NLRP1+/ASC-GFP</sup> airway epithelial cell lines infected for 24 hours with various strains of SARS-CoV-2 (MOI 0.01).

(H) Measure of cell lysis (LDH release) in A549<sup>NLRP1+</sup> or A549<sup>NLRP1-</sup> treated with Valboro (5 µM) for 10 hours or infected with SARS-CoV-2 (MOI 0.05) for 24 hours in presence/absence of the NLRP3 inhibitor MCC950 (10µM).

(I) Measure of cell lysis (LDH release) in PMA (100ng/mL)-primed THP1 myeloid cells treated with Nigericin (20µM) for 2 hours in presence/absence of the NLRP3 inhibitor MCC950 (10µM).

(J) Western blot examination of NLRP1 and SARS-CoV-2 Nucleocapsid (N) in A549<sup>ACE2/NLRP1+</sup> and A549<sup>ACE2/NLRP1-</sup> airway epithelial cell lines infected with SARS-CoV-2 for 24 hours multiplicity of infection (MOI) of 0.05 in presence /absence of the NSP5 protease inhibitor PF-00835231 (10µM), Remdesivir (5µM), or Z-VAD (25 µM).

(K) Florescence microscopy of ASC-GFP specks in A549<sup>ACE2/NLRP1+/ASC-GFP</sup> airway epithelial cell lines treated with 5µM of Valboro for 10 hours in presence/absence of the 3CL inhibitor PF-00835231 (10µM) or Remdesivir (5 µM). Images shown are from one experiment and are representative of n=3 independent experiments; scale bars 10 µm.

(L) Microscopy characterization of Air-Liquid Interface-differentiated and infected epithelial cells (ACE2, Mucin 5AC, Acylated tubulin, Nuclei, SARS-CoV-2) and measure of cell lysis (LDH release) in NHBE epithelial cells infected for 36 hours with various strains of SARS-CoV-2 (MOI 1) in presence/absence of the pan Caspase inhibitor Z-VAD (40 $\mu$ M). Images shown are from one experiment and are representative of n=2 independent experiments; scale bars 50  $\mu$ m.

Data information:

Western Blot (A, B, J) images are from one experiment performed three times. Graphs C, D, E, H, I, L show data presented as means  $\pm$  SEM from n=6 (G) or n=3 independent pooled experiments; \*\*\*p  $\leq$  0.001 for the indicated comparisons with t-test. Images (F, G, K) show one experiment performed three times.



(D) Sequence alignment of the NSP5-targeted human NLRP1<sup>Q333</sup> site with mouse and primate NLRP1.

(E) Measure of cell lysis (LDH release) in A549<sup>NLRP1+</sup> or A549<sup>NLRP1Q33A</sup> treated with Valboro (10 $\mu$ M) for 10 hours.

(F) Proposed mechanism of human NLRP1 activation by NSP5 protease.

Data informations:

Western Blot (A-C) images are from one experiment performed three times. Graph E show data presented as means  $\pm$  SEM from n=3 independent pooled experiments; \*\*\*p  $\leq$  0.001 for the indicated comparisons with t-test. G was created using biorender.com

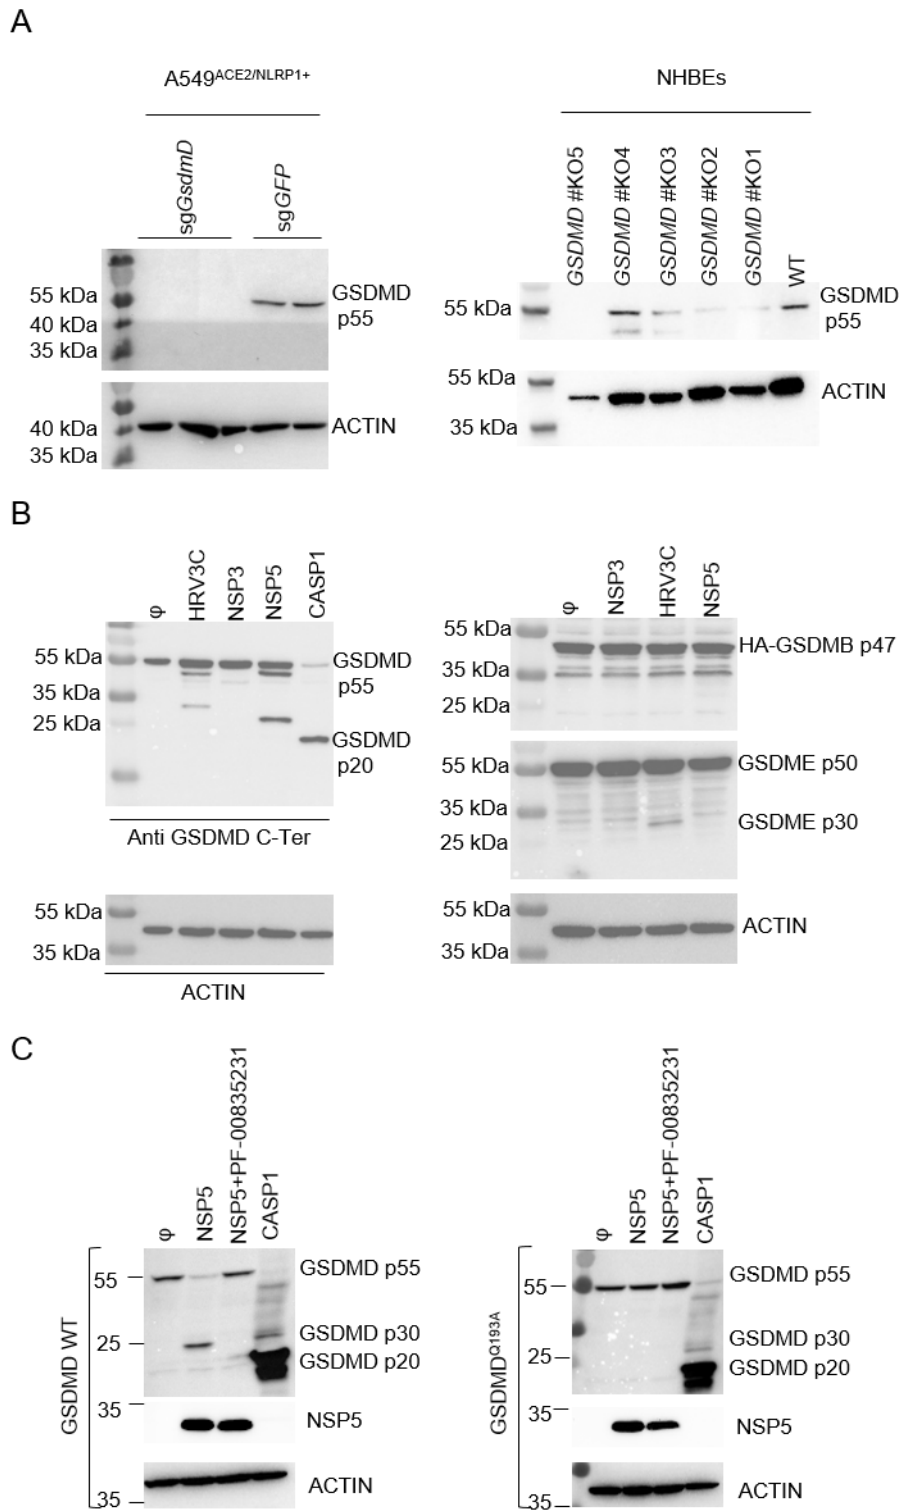

**Figure S3 (Related to Figure 3). NSP5 cleaves and inactivates GSDMD**

(A) Western Blot examination of genetic invalidation of GSDMD in A549<sup>NLRP1+</sup> or NHBE cells using CRISPR Cas9 technic.

(B) Western blot examination of Gasdermin cleavages by SARS-CoV-2 NSP5 or NSP3, HRV3C or recombinant human Caspase-1 (CASP1) proteases in cell lysates from A549 expressing GSDMD, GSDMB or GSDME. GSDMD (anti Cter), GSDME, GSDMB, NSP5 and ACTIN were immunoblotted.

(C) Western blot examination of GSDMD cleavage by SARS-CoV-2 3CL (NSP5) or recombinant human Caspase-1 (CASP1) proteases in cell lysates from A549 expressing WT GSDMD or GSDMD<sup>193A</sup> constructs in presence/absence of the 3CL inhibitor PF-00835231 (10 $\mu$ M). GSDMD (anti Cter), NSP5 and ACTIN were immunoblotted.

Data information:

Western Blot (A-C) images are from one experiment performed three times.



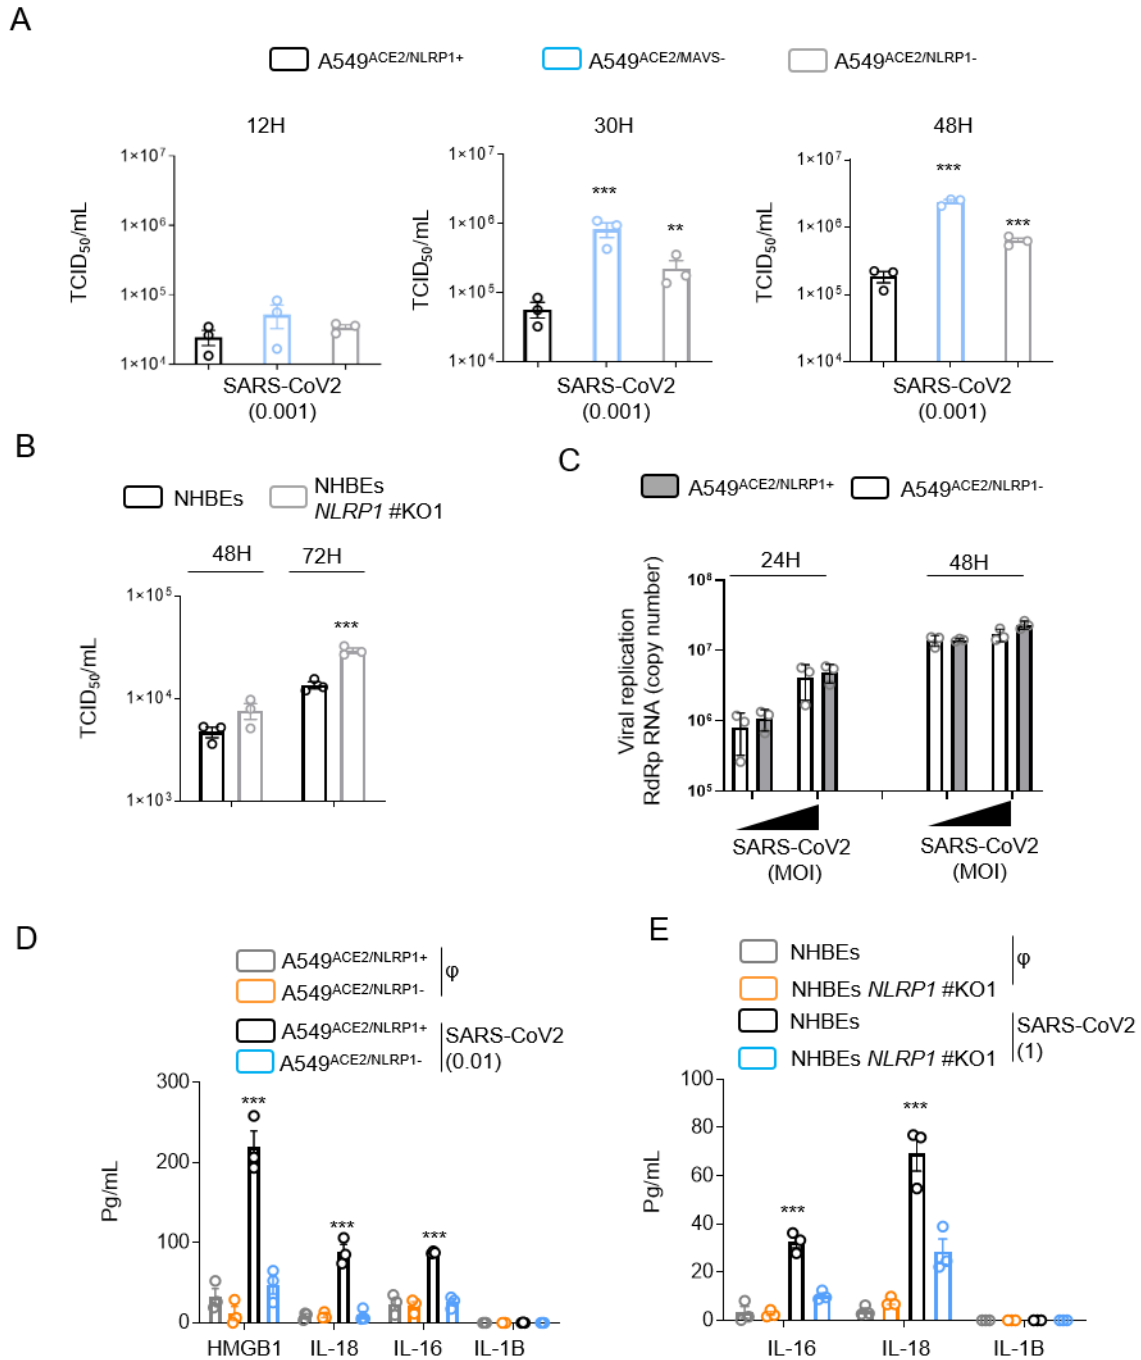

**Figure S4 (Related to Figures 1-4). NLRP1-dependent pyroptosis both limits the production of infectious particles and promotes alarmin/DAMP release**

(A) TCID<sub>50</sub> measure of production of infectious viral particles in A549<sup>ACE2/NLRP1+</sup>, A549<sup>ACE2/NLRP1-</sup> and A549<sup>ACE2/MAVS-</sup> cells infected for various times with SARS-CoV-2.

(B) TCID<sub>50</sub> measure of production of infectious viral particles in NHBE<sup>WT</sup> and NHBE<sup>NLRP1-/-</sup> cells infected for various times with SARS-CoV-2 (MOI 0.5).

(C) Q-RT PCR evaluation of SARS-CoV-2 RdRp mRNA levels in A549<sup>ACE2/NLRP1+</sup> or A549<sup>ACE2/NLRP1-</sup> cells after 24 and 48 hours of SARS-CoV-2 infection (MOIs 0.05 and 0.005).

(D, E) Measure of the release of various Alarmins/Cytokines after 24 (D) or 36 (E) hours of infection with SARS-CoV-2 (MOI 0.05 and 1 respectively) by A549<sup>ACE2/NLRP1+</sup>, A549<sup>ACE2/NLRP1-</sup>, NHBE<sup>WT</sup> and NHBE<sup>NLRP1-/-</sup> cells.

Data informations:

Graphs A-E show data presented as means  $\pm$  SEM from n=3 independent pooled experiments; \*\*p  $\leq$  0.01, \*\*\*p  $\leq$  0.001 for the indicated comparisons with t-test.

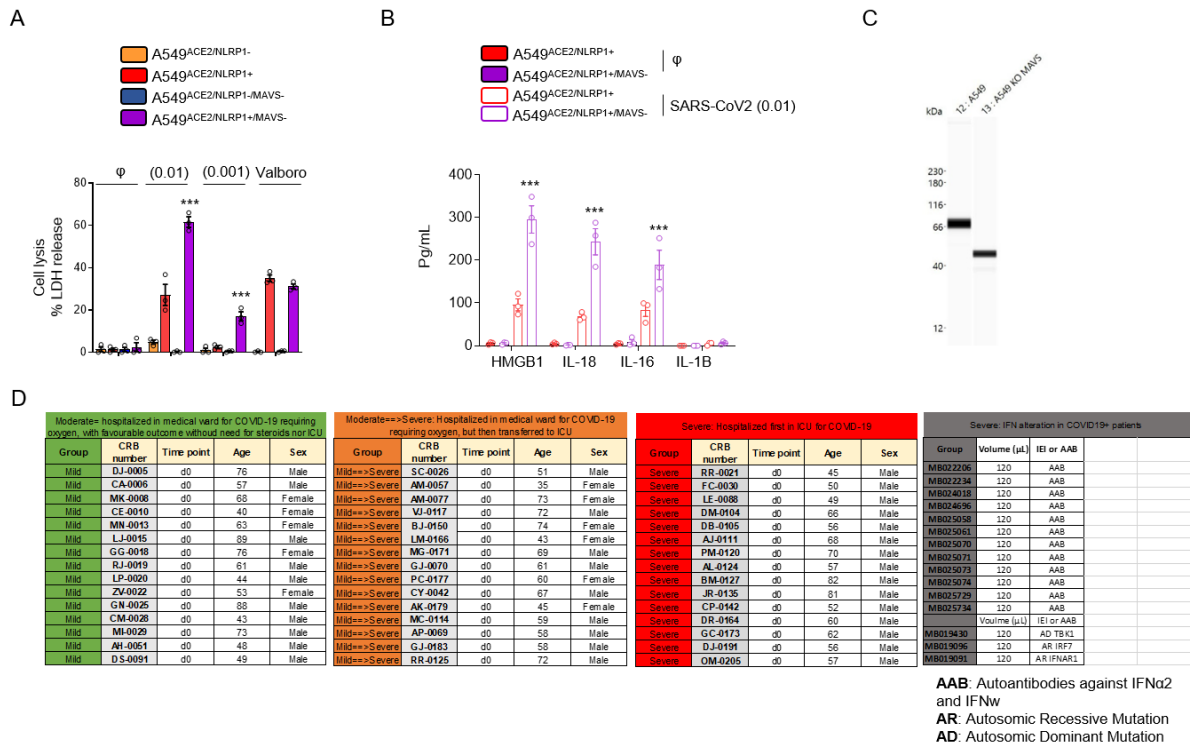

**Figure S5 (Related to Figure 4). Plasmas from COVID19 patients show enrichments in (IL)-16/-18/GSDME and CASP3.**

(A) Measure of cell lysis (LDH release) in A549<sup>NLRP1+</sup>, A549<sup>NLRP1-</sup>, A549<sup>NLRP1+/MAVS-</sup> and A549<sup>NLRP1-/MAVS-</sup> upon SARS-CoV-2 infection or Valboro (5 μM) treatment for 24 hours.

(B) Measure of cytokine/alarmin release in A549<sup>NLRP1+</sup> or A549<sup>NLRP1+/MAVS-</sup> upon SARS-CoV-2 infection for 24 hours.

(C) Western Blot examination of genetic invalidation of MAVS in A549 cells. MAVS appears at the 66kDa.

(D) Information on COVID-19<sup>+</sup> patients hospitalized and COVID-19<sup>+</sup> patients exhibiting Interferon alterations used in this study

Data information:

Graphs A, B show data presented as means ± SEM from n=3 independent pooled experiments; \*\*\*p ≤ 0.001 for the indicated comparisons with t-test. Western Blot (C) image is from one experiment.

## **COVID Human Genetic Effort members and affiliations**

The affiliations of the members of the COVID Human Genetic Effort are as follows.

Tayfun Ozcelik: Department of Molecular Biology and Genetics, Bilkent University, Bilkent - Ankara, Turkey

Nevin Hapitoglu: Pediatric Infectious Diseases Unit, Bakirkoy Dr. Sadi Konuk Training and Research Hospital, University of Health Sciences, Istanbul, Turkey

Filomeen Haerynck: Department of Pediatric Immunology and Pulmonology, Center for Primary Immunodeficiency Ghent, Jeffrey Model Diagnosis and Research Center, PID research lab, Ghent University Hospital, Ghent, Belgium

Sevgi Keles: Meram Medical Faculty, Necmettin Erbakan University, Meram Medical Faculty, Konya, Turkey

Ahmed A. Bousfiha: Clinical Immunology Unit, Department of Pediatric Infectious Disease, CHU Ibn Rushd and LICIA, Laboratoire d'Immunologie Clinique, Inflammation et Allergie, Faculty of Medicine and Pharmacy, Hassan II University, Casablanca, Morocco

Rafael Leon Lopez: Hospital Universitario Reina Sofía, Cordoba, Spain
